# Supplementary material for: The Antimicrobial Activity of Omiganan Alone and In Combination against Candida Isolated from Vulvovaginal Candidiasis and Bloodstream Infections
Source: MDPI journal article supplement (doi:10.3390/antibiotics10081001), 2021-08-19
Supplement: s1 [file s1]

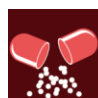

# The Antimicrobial Activity of Omiganan Alone and In Combination against *Candida* Isolated from Vulvovaginal Candidiasis and Bloodstream Infections

Dawid Żyrek <sup>1</sup>, Andrzej Wajda <sup>1</sup>, Paulina Czechowicz <sup>1,\*</sup>, Joanna Nowicka <sup>1,\*</sup>, Maciej Jaśkiewicz <sup>2</sup>, Damian Neubauer <sup>2</sup> and Wojciech Kamysz <sup>2</sup>

<sup>1</sup> Department of Microbiology, Faculty of Medicine, Wrocław Medical University; 50-367 Wrocław, Poland; dawid.zyrek96@gmail.com (D.Ż.); andrzej.wajda96@gmail.com (A.W.)

<sup>2</sup> Department of Inorganic Chemistry, Faculty of Pharmacy, Medical University of Gdańsk, 80-416 Gdańsk, Poland; mj@gumed.edu.pl (M.J.); damian.neubauer@gumed.edu.pl (D.N.); wojciech.kamysz@gumed.edu.pl (W.K.)

\* Correspondence: paulina.czechowicz.umedwroc@gmail.com (P.C.); joanna.nowicka@umed.wroc.pl (J.N.)

**Table S1.** The checkerboard method. Blue color indicates fluconazole concentrations, and green color indicates Omiganan concentrations, in both cases within the range of 0.5–64 µg/mL. K+ is the positive control (microorganism growth control), and K– is the medium sterility control (negative control).

| No of row | 1   | 2   | 3   | 4   | 5   | 6   | 7   | 8   | 9  | 10 | 11 | 12 |
|-----------|-----|-----|-----|-----|-----|-----|-----|-----|----|----|----|----|
| A         | 64  | 32  | 16  | 8   | 4   | 2   | 1   | 0.5 | K+ | K– |    |    |
|           | 64  | 64  | 64  | 64  | 64  | 64  | 64  | 64  |    |    |    |    |
| B         | 64  | 32  | 16  | 8   | 4   | 2   | 1   | 0.5 | K+ | K– |    |    |
|           | 32  | 32  | 32  | 32  | 32  | 32  | 32  | 32  |    |    |    |    |
| C         | 64  | 32  | 16  | 8   | 4   | 2   | 1   | 0.5 | K+ | K– |    |    |
|           | 16  | 16  | 16  | 16  | 16  | 16  | 16  | 16  |    |    |    |    |
| D         | 64  | 32  | 16  | 8   | 4   | 2   | 1   | 0.5 | K+ | K– |    |    |
|           | 8   | 8   | 8   | 8   | 8   | 8   | 8   | 8   |    |    |    |    |
| E         | 64  | 32  | 16  | 8   | 4   | 2   | 1   | 0.5 | K+ | K– |    |    |
|           | 4   | 4   | 4   | 4   | 4   | 4   | 4   | 4   |    |    |    |    |
| F         | 64  | 32  | 16  | 8   | 4   | 2   | 1   | 0.5 | K+ | K– |    |    |
|           | 2   | 2   | 2   | 2   | 2   | 2   | 2   | 2   |    |    |    |    |
| G         | 64  | 32  | 16  | 8   | 4   | 2   | 1   | 0.5 | K+ | K– |    |    |
|           | 1   | 1   | 1   | 1   | 1   | 1   | 1   | 1   |    |    |    |    |
| H         | 64  | 32  | 16  | 8   | 4   | 2   | 1   | 0.5 | K+ | K– |    |    |
|           | 0.5 | 0.5 | 0.5 | 0.5 | 0.5 | 0.5 | 0.5 | 0.5 |    |    |    |    |

**Table S2.** MIC and MBEC values [µg/mL] of fluconazole and Omiganan against reference *Candida* strains.

| Strain                        | Fluconazole |      | Omiganan |      |
|-------------------------------|-------------|------|----------|------|
|                               | MIC         | MBEC | MIC      | MBEC |
| <i>C. albicans</i> ATCC 90028 | 0.125       | 1024 | 256      | 256  |
| <i>C. glabrata</i> ATCC 15126 | 4           | 1024 | 128      | 256  |

**Table S3.** Distribution of MIC and MBEC values [ $\mu\text{g/mL}$ ] of fluconazole and Omiganan among vaginal (VVC) *Candida* strains.

| No  | Strain               | Fluconazole |      | Omiganan |      |
|-----|----------------------|-------------|------|----------|------|
|     |                      | MIC         | MBEC | MIC      | MBEC |
| V1  | <i>C. albicans</i>   | 0.125       | 512  | 128      | 128  |
| V2  | <i>C. albicans</i>   | 0.125       | 512  | 256      | 256  |
| V3  | <i>C. albicans</i>   | 0.125       | 1024 | 256      | 256  |
| V4  | <i>C. albicans</i>   | 0.125       | 1024 | 256      | 256  |
| V5  | <i>C. lusitaniae</i> | 0.25        | 1024 | 64       | 256  |
| V6  | <i>C. kefyr</i>      | 1           | 512  | 64       | 256  |
| V7  | <i>C. albicans</i>   | 0.125       | 1024 | 256      | 256  |
| V8  | <i>C. albicans</i>   | 0.125       | 1024 | 128      | 256  |
| V9  | <i>C. albicans</i>   | 0.125       | 1024 | 128      | 256  |
| V10 | <i>C. albicans</i>   | 0.125       | 1024 | 128      | 256  |
| V11 | <i>C. albicans</i>   | 0.125       | 1024 | 128      | 256  |
| V12 | <i>C. albicans</i>   | 0.125       | 1024 | 256      | 256  |
| V13 | <i>C. albicans</i>   | 0.125       | 512  | 128      | 256  |
| V14 | <i>C. albicans</i>   | 0.125       | 1024 | 128      | 256  |
| V15 | <i>C. albicans</i>   | 0.25        | 512  | 128      | 256  |
| V16 | <i>C. albicans</i>   | 0.125       | 1024 | 128      | 256  |
| V17 | <i>C. albicans</i>   | 0.125       | 512  | 128      | 256  |
| V18 | <i>C. albicans</i>   | 0.125       | 1024 | 256      | 256  |
| V19 | <i>C. albicans</i>   | 0.125       | 512  | 256      | 256  |
| V20 | <i>C. albicans</i>   | 0.125       | 512  | 128      | 256  |
| V21 | <i>C. albicans</i>   | 0.125       | 512  | 256      | 256  |
| V22 | <i>C. albicans</i>   | 0.125       | 512  | 256      | 256  |
| V23 | <i>C. albicans</i>   | 0.125       | 512  | 256      | 256  |
| V24 | <i>C. albicans</i>   | 0.125       | 512  | 128      | 256  |
| V25 | <i>C. albicans</i>   | 0.125       | 512  | 128      | 256  |
| V26 | <i>C. albicans</i>   | 0.125       | 512  | 128      | 256  |
| V27 | <i>C. albicans</i>   | 0.125       | 1024 | 128      | 256  |
| V28 | <i>C. albicans</i>   | 0.125       | 1024 | 256      | 256  |
| V29 | <i>C. albicans</i>   | 0.125       | 512  | 128      | 256  |
| V30 | <i>C. albicans</i>   | 0.25        | 512  | 128      | 256  |
| V31 | <i>C. albicans</i>   | 0.125       | 512  | 128      | 256  |
| V32 | <i>C. albicans</i>   | 0.25        | 1024 | 128      | 256  |

**Table S4.** Distribution of MIC and MBEC values [ $\mu\text{g/mL}$ ] of fluconazole and Omiganan among vaginal (VVC) and blood-derived (BSI) *Candida* strains.

| No  | Strain                 | Fluconazole |      | Omiganan |      |
|-----|------------------------|-------------|------|----------|------|
|     |                        | MIC         | MBEC | MIC      | MBEC |
| B1  | <i>C. kefyr</i>        | 4           | 512  | 256      | 256  |
| B2  | <i>C. parapsilosis</i> | 0.5         | 1024 | 256      | 256  |
| B3  | <i>C. glabrata</i>     | 0.125       | 512  | 128      | 256  |
| B4  | <i>C. parapsilosis</i> | 16          | 512  | 256      | 256  |
| B5  | <i>C. parapsilosis</i> | 0.5         | 512  | 64       | 256  |
| B6  | <i>C. glabrata</i>     | 4           | 512  | 256      | 256  |
| B7  | <i>C. albicans</i>     | 0.125       | 512  | 256      | 256  |
| B8  | <i>C. glabrata</i>     | 4           | 512  | 256      | 256  |
| B9  | <i>C. tropicalis</i>   | 0.25        | 1024 | 32       | 256  |
| B10 | <i>C. tropicalis</i>   | 0.25        | 512  | 128      | 256  |
| B11 | <i>C. parapsilosis</i> | 0.25        | 1024 | 256      | 256  |

|     |                    |       |      |     |     |
|-----|--------------------|-------|------|-----|-----|
| B12 | <i>C. krusei</i>   | 32    | 1024 | 128 | 256 |
| B13 | <i>C. albicans</i> | 16    | 1024 | 128 | 256 |
| B14 | <i>C. glabrata</i> | 8     | 512  | 256 | 256 |
| B15 | <i>C. albicans</i> | 0.25  | 1024 | 128 | 256 |
| B16 | <i>C. glabrata</i> | 0.5   | 512  | 128 | 256 |
| B17 | <i>C. glabrata</i> | 0.5   | 1024 | 256 | 256 |
| B18 | <i>C. glabrata</i> | 64    | 512  | 256 | 256 |
| B19 | <i>C. albicans</i> | 0.25  | 1024 | 256 | 256 |
| B20 | <i>C. krusei</i>   | 32    | 512  | 128 | 256 |
| B21 | <i>C. glabrata</i> | 0.25  | 512  | 256 | 256 |
| B22 | <i>C. albicans</i> | 0.125 | 512  | 128 | 256 |
| B23 | <i>C. albicans</i> | 0.125 | 1024 | 128 | 256 |
| B24 | <i>C. krusei</i>   | 16    | 1024 | 128 | 256 |
| B25 | <i>C. albicans</i> | 0.125 | 1024 | 256 | 256 |
| B26 | <i>C. albicans</i> | 0.125 | 1024 | 256 | 256 |
| B27 | <i>C. glabrata</i> | 0.25  | 1024 | 256 | 256 |
| B28 | <i>C. glabrata</i> | 4     | 512  | 256 | 256 |
| B29 | <i>C. kefyr</i>    | 0.125 | 512  | 128 | 256 |
| B30 | <i>C. glabrata</i> | 1     | 512  | 256 | 256 |

**Table S5.** Correlation between the lowest obtained FIC values and corresponding concentration [ $\mu\text{g/mL}$ ] of Omiganan, compared to MIC [ $\mu\text{g/mL}$ ] of Omiganan against 24 random selected *Candida* isolates.

| No  | isolation                     | Strain                 | The lowest FIC | Interpretation of FIC* | Concentration of Omiganan Corresponding to FIC | MIC of Omiganan |
|-----|-------------------------------|------------------------|----------------|------------------------|------------------------------------------------|-----------------|
| -   | <i>C. albicans</i> ATCC 90028 |                        | 0.266          | S                      | 64                                             | 256             |
| -   | <i>C. glabrata</i> ATCC 15126 |                        | 0.266          | S                      | 32                                             | 128             |
| B9  | BSI                           | <i>C. tropicalis</i>   | 0.515          | A                      | 16                                             | 32              |
| B5  | BSI                           | <i>C. parapsilosis</i> | 0.531          | A                      | 32                                             | 64              |
| B3  | BSI                           | <i>C. glabrata</i>     | 0.515          | A                      | 64                                             | 128             |
| B17 | BSI                           | <i>C. glabrata</i>     | 0.5            | S                      | 32                                             | 128             |
| B23 | BSI                           | <i>C. albicans</i>     | 0.515          | A                      | 64                                             | 128             |
| B24 | BSI                           | <i>C. albicans</i>     | 0.563          | A                      | 64                                             | 128             |
| B7  | BSI                           | <i>C. albicans</i>     | 0.266          | S                      | 64                                             | 256             |
| B22 | BSI                           | <i>C. glabrata</i>     | 0.141          | S                      | 32                                             | 256             |
| B27 | BSI                           | <i>C. albicans</i>     | 0.266          | S                      | 64                                             | 256             |
| B28 | BSI                           | <i>C. albicans</i>     | 0.515          | A                      | 128                                            | 256             |
| B13 | BSI                           | <i>C. albicans</i>     | 0.141          | S                      | 16                                             | 128             |
| B14 | BSI                           | <i>C. glabrata</i>     | 0.5            | S                      | 64                                             | 256             |
| V5  | VVC                           | <i>C. lusitaniae</i>   | 0.281          | S                      | 16                                             | 64              |
| V6  | VVC                           | <i>C. kefyr</i>        | 0.625          | A                      | 32                                             | 64              |
| V8  | VVC                           | <i>C. albicans</i>     | 1.016          | I                      | 128                                            | 128             |
| V13 | VVC                           | <i>C. albicans</i>     | 0.515          | A                      | 64                                             | 128             |
| V14 | VVC                           | <i>C. albicans</i>     | 0.563          | A                      | 64                                             | 128             |
| V16 | VVC                           | <i>C. albicans</i>     | 0.515          | A                      | 64                                             | 128             |
| V2  | VVC                           | <i>C. albicans</i>     | 0.266          | S                      | 64                                             | 256             |
| V3  | VVC                           | <i>C. albicans</i>     | 0.266          | S                      | 64                                             | 256             |
| V4  | VVC                           | <i>C. albicans</i>     | 0.266          | S                      | 64                                             | 256             |
| V7  | VVC                           | <i>C. albicans</i>     | 0.266          | S                      | 64                                             | 256             |

\*S-synergy; A-Additive, I- Indifferent.
